# Supplementary material for: Thermal Stability Improvement of Core Material via High Internal Phase Emulsion Gels
Source: MDPI journal article supplement (doi:10.3390/polym15214272), 2023-10-30
Supplement: s1 [file s1]

# Supplementary Materials: Thermal stability improvement of core material via high internal phase emulsion gels

Jinhua Hu, Yongxue Liang, Xueyao Huang, Guangxue Chen, Dingrong Liu, Zhuangzhuang Chen, Zheng Fang and Xuelong Chen

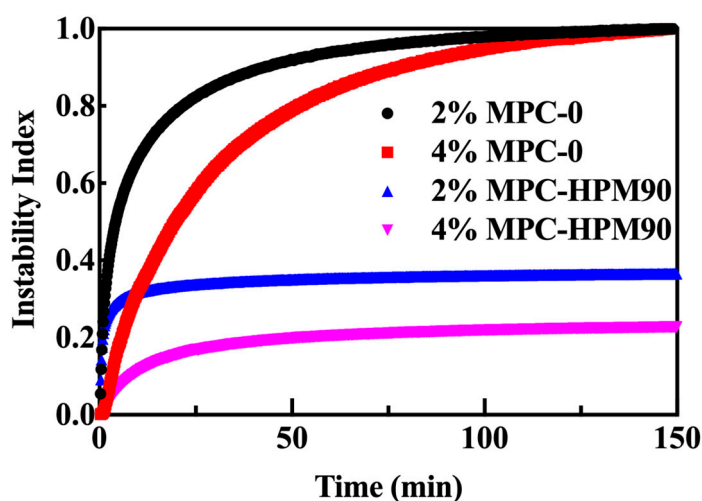

Figure S1. The instability index of HIPE-gels.
